# Supplementary material for: High-performance polyimide coatings for mild steel: the impact of benzophenone, biphenyl, and bisphenol-a core structures
Source: Royal Society of Chemistry journal article supplement (doi:10.1039/d5ra05765e), 2026-01-01
Supplement: d5ra05765e1.pdf [file d5ra05765e1.pdf]

## High-Performance Polyimide Coatings for Mild Steel: The Impact of Benzophenone, Biphenyl, and Bisphenol-A Core Structures

Sukanta Badaik<sup>1, 2, §</sup>, Suryakanta Nayak<sup>2, \*</sup>, Balram Ambade<sup>1</sup>, Tapan Kumar Rout<sup>2, \*</sup>

<sup>1</sup>Department of Chemistry, National Institute of Technology Jamshedpur, 831014, India.

<sup>2</sup>R&D, Surface Engineering Research Group, Tata Steel Limited, Jamshedpur 831001, India

§ Joint Ph.D. scholar of the Department of Chemistry, National Institute of Technology, Jamshedpur and R&D, Surface Engineering Research Group, Tata Steel Limited.

**Corresponding Author:** Tapan Kumar Rout and Suryakanta Nayak

**Email ID:** tapankumarrou@tatasteel.com and suryakanta.nayak@tatasteel.com

### TGA

The thermal behaviour of PI-1, PI-2, and PI-3 polyimide films was investigated by TGA and is shown in **Fig. S1**.

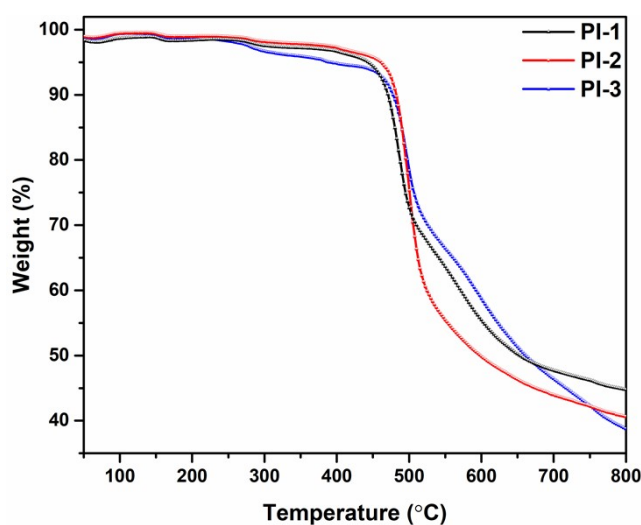

**Fig. S1.** TGA graph of PI-1, PI-2 and PI-3.
